# Supplementary material
Source: Springer Nature journal article supplement (https://www.springermedizin.de/resource/supplementary/13013_2006_24_MOESM2_ESM.pdf/9631026)

51

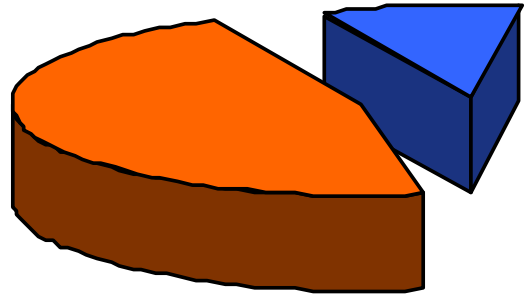

10

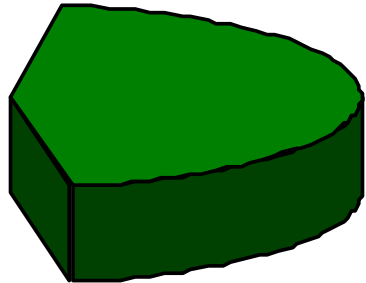

50

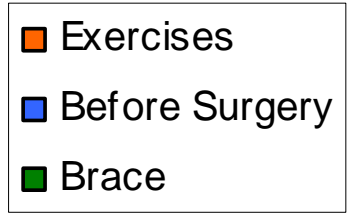

Supplement: MOESM2 [file 9631026]
